# Supplementary material for: Climate change and anthropological impacts on a karst aquifer: a multi- statistical assessment
Source: Research Square preprint supplement (doi:10.21203/rs.3.rs-2296043/v1), 2022-11-29
Supplement: Supplementary file 1 [file 0083bcfd37db7e2178e95502.docx]

Table 8. MK-Z values of the original data, details components (D1–D6), approximations (A), and a set of combination of the details and their respective approximation (A+Ds). The most effective periodic components affecting the time series trend are indicated in boldface.

| Time series | Groundwater level | | Rainfall | | | | Temperature | | |
| --- | --- | --- | --- | --- | --- | --- | --- | --- | --- |
|  | (P1) | (P2) | Boushigan | Kazerun | Parishan | Dasht -Arjan | Kazerun | Parishan | Dasht Arjan |
| original | -20.66 | -22.13 | -0.52 | -1.18 | -0.99 | -0.42 | 8.98 | -1.94 | 1.46 |
| D1 | NaN | -0.08 | -5.32 | NaN | -0.35 | 0.12 | NaN | NaN | NaN |
| D2 | 0.323 | 0.098 | 0.09 | -0.35 | 0.47 | -0.35 | 0.47 | -0.02 | -0.06 |
| D3 | 0.98 | 1.17 | 1.00 | -1.23 | 1.43 | -1.29 | 1.22 | 0.90 | -0.26 |
| D4 | -0.79 | 0.28 | -0.47 | -0.28 | -0.80 | -0.06 | -0.05 | -0.28 | 1.08 |
| D5 | -1.63 | -0.94 | 0.42 | 1.91 | 0.72 | 2.37 | -0.15 | -0.21 | 0.05 |
| D6 | 0.34 | 0.00 | -0.25 | -0.24 | -0.43 | -0.75 | -0.93 | -2.84 | 2.48 |
| A | -5.09 | -5.63 | -2.03 | -3.51 | -3.49 | -4.20 | 3.14 | -0.81 | -0.01 |
| A+D1 | -4.96 | -5.60 | -2.29 | -4.60 | -4.48 | -5.26 | 10.09 | **-2.01** | -0.56 |
| A+D2 | -26.16 | -26.90 | -2.55 | -5.72 | -5.49 | -5.78 | 12.21 | -1.81 | -2.78 |
| A+D3 | -25.18 | -26.48 | -1.77 | -7.95 | -4.50 | -7.22 | **8.24** | -0.77 | -1.85 |
| A+D4 | -24.86 | -25.75 | -5.02 | -6.60 | -11.45 | -6.88 | 6.56 | -1.29 | -0.66 |
| A+D5 | -24.28 | -25.50 | -5.00 | **-3.84** | **-3.06** | -7.74 | 5.24 | -2.84 | -0.64 |
| A+D6 | **-21.72** | **-21.91** | **-1.62** | -4.71 | -3.96 | **-4.30** | 3.72 | -3.65 | **1.20** |
