# Supplementary material for: Climate change and anthropological impacts on a karst aquifer: a multi- statistical assessment
Source: Research Square preprint supplement (doi:10.21203/rs.3.rs-2296043/v1), 2022-11-29
Supplement: Supplementary file 2 [file 00856df7865b2d46bca8acbc.docx]

Table 13. The correlation coefficient values between original time series and their (A+Ds) components at the annual scale.

| Time series | Groundwater level | | Rainfall | | | | Temperature | | |
| --- | --- | --- | --- | --- | --- | --- | --- | --- | --- |
|  | P1 | P2 | Boushigan | Kazerun | Parishan | Dasht-Arjan | Kazerun | Parishan | Dasht Arjan |
| A+D1 | 0.956** | 0.967** | 0.744** | 0.806** | 0.780** | 0.734** | **0.819**** | **0.759**** | **0.705**** |
| A+D2 | 0.960** | 0.972** | **0.797**** | **0.859**** | **0.862**** | **0.810**** | 0.785** | 0.654** | 0.515** |
| A+D3 | **0.980**** | **0.988**** | 0.536** | 0.672** | 0.693** | 0.621** | 0.806** | 0.505** | 0.551** |
| **Correlation is significant at the 0.01 level (2-tailed). | | | | |  |  |  |  |  |
| *Correlation is significant at the 0.05 level (2-tailed). | | | | |  |  |  |  |  |
