# Supplementary material for: Climate change and anthropological impacts on a karst aquifer: a multi- statistical assessment
Source: Research Square preprint supplement (doi:10.21203/rs.3.rs-2296043/v1), 2022-11-29
Supplement: Supplementary file 3 [file 19d72c7042b313cf880f2fd2.docx]

Table 11. Lag-1 autocorrelations of the original annual time series and those of their transformed series. Bold numbers indicate significant lag-1 autocorrelation at a 95% confidence limit.

| Time series | Groundwater level | | Rainfall | | | | Temperature | | |
| --- | --- | --- | --- | --- | --- | --- | --- | --- | --- |
|  | (P1) | (P2) | Boushigan | Kazerun | Parishan | Dasht-Arjan | Kazerun | Parishan | Dasht-Arjan |
| original | **0.881** | **0.913** | 0.218 | **0.364** | **0.406** | **0.373** | **0.646** | -0.016 | 0.110 |
| D1 | -0.462 | -0.448 | -0.625 | -0.632 | -0.644 | -0.737 | -0.546 | -0.578 | -0.629 |
| D2 | **0.378** | **0.513** | **0.348** | **0.336** | **0.275** | **0.441** | **0.423** | **0.356** | **0.227** |
| D3 | **0.714** | **0.728** | **0.777** | **0.739** | **0.744** | **0.766** | **0.771** | **0.761** | **0.807** |
| A | **0.937** | **0.937** | **0.959** | **0.949** | **0.950** | **0.959** | **0.939** | **0.940** | **0.842** |
| A+D1 | **0.916** | **0.930** | 0.123 | **0.417** | **0.482** | **0.218** | **0.570** | -0.343 | -0.463 |
| A+D2 | **0.933** | **0.936** | **0.566** | **0.653** | **0.620** | **0.673** | **0.862** | **0.472** | **0.320** |
| A+D3 | **0.913** | **0.921** | **0.925** | **0.925** | **0.921** | **0.930** | **0.912** | **0.846** | **0.849** |
