# Supplementary material for: Climate change and anthropological impacts on a karst aquifer: a multi- statistical assessment
Source: Research Square preprint supplement (doi:10.21203/rs.3.rs-2296043/v1), 2022-11-29
Supplement: Supplementary file 4 [file 31cd49cc606301dfa508fa91.docx]

Table 10 The normalize root mean square error(NRMSE) resulting from the application of the three border extension modes at two decomposition levels on the annual time series.

| **Station** | **Series** | **Decomposition level (3)** | | | | **Decomposition level (4)** | | |
| --- | --- | --- | --- | --- | --- | --- | --- | --- |
| **No. of data** | **ZP** | **SYM** | **PD** | **ZP** | **SYM** | **PD** |
| Boushigan | Rainfall | 32 | 0.050 | **0.038** | 0.040 | 0.051 | **0.039** | 0.065 |
| Kazerun | Rainfall | 32 | 0.056 | **0.043** | 0.045 | 0.061 | **0.044** | 0.068 |
|  | Temperature | 32 | 0.034 | **0.004** | 0.005 | 0.037 | **0.004** | 0.011 |
| Parishan | Rainfall | 32 | 0.057 | **0.044** | 0.048 | 0.062 | **0.044** | 0.112 |
|  | Temperature | 32 | 0.035 | **0.004** | 0.004 | 0.039 | **0.004** | 0.007 |
| Dasht-Arjan | Rainfall | 32 | 0.052 | **0.042** | 0.042 | 0.057 | **0.043** | 0.051 |
|  | Temperature | 32 | 0.034 | **0.009** | 0.009 | 0.037 | **0.009** | 0.012 |
| Piezometer | (P1) | 32 | 0.034 | **0.001** | 0.001 | 0.037 | **0.001** | 0.001 |
|  | (P2) | 32 | 0.034 | **0.001** | 0.001 | 0.038 | **0.001** | 0.001 |
