# Supplementary material for: Climate change and anthropological impacts on a karst aquifer: a multi- statistical assessment
Source: Research Square preprint supplement (doi:10.21203/rs.3.rs-2296043/v1), 2022-11-29
Supplement: Supplementary file 5 [file 3fca79faac1f579317960fd6.docx]

Table 12. MK-Z values of the annual original data, details components (D1–D3), approximations (A), and a set of combination of the details and their respective approximation (A+Ds). - value of combinations closer to that of corresponding original time series are highlighted in boldface.

| Time series | Groundwater level | | Rainfall | | | | Temperature | | |
| --- | --- | --- | --- | --- | --- | --- | --- | --- | --- |
|  | (P1) | (P2) | Boushigan | Kazerun | Parishan | Dasht-Arjan | Kazerun | Parishan | Dasht-Arjan |
| original | -6.29 | -6.42 | -2.66 | -3.62 | -3.78 | -4.45 | 6.00 | -1.68 | 0.93 |
| D1 | 0.15 | 0.27 | - | - | - | - | -1.66 | -0.88 | - |
| D2 | - | -0.34 | 0.00 | 0.04 | 0.00 | 0.02 | - | 0.12 | - |
| D3 | -0.38 | 0.04 | 0.77 | 0.85 | 0.51 | 0.54 | 0.53 | -0.95 | -0.13 |
| A | -4.50 | -5.14 | -3.55 | -4.50 | -4.46 | -3.85 | 5.03 | -3.41 | 5.36 |
| A+D1 | -4.19 | -5.04 | -3.65 | -16.57 | -8.88 | -6.62 | 11.92 | **-1.92** | 2.84 |
| A+D2 | -5.35 | **-5.39** | -3.99 | -3.09 | **-4.07** | **-4.01** | **4.46** | -2.43 | - |
| A+D3 | **-6.23** | -4.92 | **-2.83** | **-3.51** | -4.86 | -5.06 | 10.60 | -3.81 | **2.10** |
