# Supplementary material for: Climate change and anthropological impacts on a karst aquifer: a multi- statistical assessment
Source: Research Square preprint supplement (doi:10.21203/rs.3.rs-2296043/v1), 2022-11-29
Supplement: Supplementary file 6 [file 48860cf8bc1932740741db18.docx]

| **Well no.** | **UTM-zone 39R** | | **Well head** | **Depth of initial** | **Well** | **Discharge** |
| --- | --- | --- | --- | --- | --- | --- |
|  | **X** | **Y** | **Elevation, m (a.m.s.l)** | **water table (m)** | **depth (m)** | **rate (L/s)** |
| P1 | 554127 | 3283630 | 816.0 | 96.0 | 236 | - |
| P2 | 554568 | 3280863 | 808.0 | 73.0 | 207 | - |
| P3 | 554479 | 3280800 | 819.8 | 116.1 | 213 | - |
| P4 | 553834 | 3285620 | 801.8 | 92.2 | 130 | - |
| P5 | 554347 | 3279440 | 824.6 | 103.7 | 318 | - |
| P6 | 554445 | 3279686 | 820.2 | 116.5 | 350 | - |
| W1 | 553829 | 3284788 | 838.0 | 183.0 | 300 | 29 |
| W2 | 553978 | 3284432 | 833.0 | 167.0 | 225 | 24 |
| W3 | 554051 | 3284129 | 824.0 | 155.0 | 250 | 21 |
| W4 | 553892 | 3283472 | 836.0 | 181.0 | 300 | 15 |
| W5 | 554167 | 3283383 | 816.0 | 162.0 | 340 | 11 |
| W6 | 554209 | 3283239 | 814.0 | 144.0 | 300 | 13 |
| W7 | 554239 | 3282944 | 811.0 | 175.0 | 247 | 9 |
| W8 | 554143 | 3282860 | 817.0 | 188.0 | 264 | 10 |
| W9 | 554265 | 3282659 | 812.0 | 152.0 | 254 | 22 |
| W10 | 554269 | 3282406 | 822.0 | 143.0 | 250 | 23 |
| W11 | 554328 | 3282266 | 814.0 | 166.0 | 215 | 29 |
| W12 | 554431 | 3281224 | 818.0 | 140.0 | 348 | 10.5 |
| W13 | 554477 | 3280895 | 816.0 | 184.0 | 319 | 15.5 |
| W14 | 554505 | 3280523 | 816.0 | 178.0 | 220 | 28 |
| W15 | 554550 | 3280283 | 814.0 | 146.0 | 200 | 30 |

Table 1 Location and some specifications of pumping (W) and observation (P) wells
