# Supplementary material for: Climate change and anthropological impacts on a karst aquifer: a multi- statistical assessment
Source: Research Square preprint supplement (doi:10.21203/rs.3.rs-2296043/v1), 2022-11-29
Supplement: Supplementary file 7 [file 80fbf537e6dfa436d5c4ab3b.docx]

Table 7. Lag-one autocorrelations and seasonality of the original monthly time series, details (D1–D6), approximations (A), and a set of combination of the details and their respective approximation (A–Ds) (*Indicates the presence of seasonality cycle, bold number indicates significant lag-1 serial correlations at a 5% significance level).

| Time series | Groundwater level | | Rainfall | | | | Temperature | | |
| --- | --- | --- | --- | --- | --- | --- | --- | --- | --- |
|  | (P1) | (P2) | Boushigan | Kazerun | Parishan | Dasht -Arjan | Kazerun | Parishan | Dasht Arjan |
| original | **0.988*** | **0.993*** | **0.398*** | **0.382*** | **0.375*** | **0.400*** | **0.851*** | **0.850*** | **0.848*** |
| D1 | -0.523 | -0.560 | -0.555 | -0.651 | -0.554 | -0.634 | -0.636 | -0.601 | -0.614 |
| D2 | **0.454*** | **0.406*** | **0.411*** | **0.381*** | **0.412*** | **0.379*** | **0.446*** | **0.438*** | **0.449*** |
| D3 | **0.850*** | **0.845*** | **0.833*** | **0.834*** | **0.831*** | **0.837*** | **0.842*** | **0.843*** | **0.842*** |
| D4 | **0.95*** | **0.944*** | **0.942*** | **0.935*** | **0.941*** | **0.935*** | **0.952*** | **0.953*** | **0.958*** |
| D5 | **0.985*** | **0.986*** | **0.983*** | **0.982*** | **0.981*** | **0.983*** | **0.985*** | **0.984*** | **0.988*** |
| D6 | **0.997*** | **0.997*** | **0.997*** | **0.992*** | **0.998*** | **0.996*** | **0.990*** | **0.992*** | **0.986*** |
| A | **0.994** | **0.994** | **0.986** | **1.000** | **0.998** | **0.998** | **0.995** | **0.954** | **0.987** |
| A+D1 | **0.991** | **0.993** | -0.496 | -0.553 | -0.461 | -0.542 | -0.008 | **-0.187*** | **0.407** |
| A+D2 | **0.992*** | **0.994*** | **0.443*** | **0.412*** | **0.470*** | **0.416*** | **0.474*** | **0.451*** | **0.512*** |
| A+D3 | **0.990*** | **0.993*** | **0.836*** | **0.842*** | **0.838*** | **0.844*** | **0.843*** | **0.842*** | **0.845*** |
| A+D4 | **0.993*** | **0.994*** | **0.951*** | **0.948*** | **0.955** | **0.946** | **0.954*** | **0.949*** | **0.962*** |
| A+D5 | **0.994*** | **0.995*** | **0.984*** | **0.989** | **0.988** | **0.989*** | **0.990** | **0.966*** | **0.986** |
| A+D6 | **0.994*** | **0.995*** | **0.988** | **0.996** | **0.997** | **0.998** | **0.992** | **0.926** | **0.948** |
