# Supplementary material for: Climate change and anthropological impacts on a karst aquifer: a multi- statistical assessment
Source: Research Square preprint supplement (doi:10.21203/rs.3.rs-2296043/v1), 2022-11-29
Supplement: Supplementary file 8 [file a1ccaa0cb4078b760c42c9e7.docx]

Table 4. The mean relative error (MRE) resulting from the application of the three border extension modes at two decomposition levels on the monthly time series.

| **Station** | **Series** | **Decomposition level (6)** | | | | **Decomposition level (7)** | | |
| --- | --- | --- | --- | --- | --- | --- | --- | --- |
| **No. of data** | **ZPE** | **SYE** | **PE** | **ZPE** | **SYE** | **PE** |
| Boushigan | Rainfall | 384 | **1.815** | 1.844 | 5.685 | **1.691** | 1.906 | 26.407 |
| Kazerun | Rainfall | 384 | **3.661** | 3.684 | 9.401 | **3.568** | 3.681 | 43.044 |
|  | Temperature | 384 | **0.427** | 0.429 | 0.476 | **0.424** | 0.427 | 0.550 |
| Parishan | Rainfall | 384 | **0.687** | 0.707 | 2.735 | **0.637** | 0.724 | 11.725 |
|  | Temperature | 384 | **0.451** | 0.453 | 0.508 | **0.447** | 0.451 | 0.591 |
| Dasht-Arjan | Rainfall | 384 | **4.566** | 4.667 | 8.573 | **4.625** | 4.785 | 27.848 |
|  | Temperature | 384 | **1.258** | 1.275 | 1.390 | **1.251** | 1.270 | 1.487 |
| Piezometer | (P1) | 384 | 0.059 | **0.005** | 0.007 | 0.124 | **0.006** | 0.013 |
|  | (P2) | 384 | 0.059 | **0.004** | 0.005 | 0.125 | **0.005** | 0.009 |
