# Supplementary material for: Climate change and anthropological impacts on a karst aquifer: a multi- statistical assessment
Source: Research Square preprint supplement (doi:10.21203/rs.3.rs-2296043/v1), 2022-11-29
Supplement: Supplementary file 9 [file b0e95943d1381edb6245e1c7.docx]

Table 6. The normalize root mean square error(NRMSE) resulting from the application of the three border extension modes at two decomposition levels on the monthly time series.

| **Station** | **Series** | **Decomposition level (6)** | | | | **Decomposition level (7)** | | |
| --- | --- | --- | --- | --- | --- | --- | --- | --- |
| **No. of data** | **ZP** | **SYM** | **PD** | **ZP** | **SYM** | **PD** |
| Boushigan | Rainfall | 384 | 0.081 | **0.080** | 0.343 | 0.081 | **0.080** | 0.889 |
| Kazerun | Rainfall | 384 | 0.081 | **0.081** | 0.380 | 0.082 | **0.081** | 0.991 |
|  | Temperature | 384 | 0.020 | **0.019** | 0.024 | 0.021 | **0.019** | 0.030 |
| Parishan | Rainfall | 384 | 0.084 | **0.083** | 0.376 | 0.084 | **0.084** | 0.981 |
|  | Temperature | 384 | 0.021 | **0.020** | 0.025 | 0.022 | **0.020** | 0.032 |
| Dasht-Arjan | Rainfall | 384 | 0.076 | **0.075** | 0.220 | 0.076 | **0.076** | 0.553 |
|  | Temperature | 384 | 0.029 | **0.028** | 0.035 | 0.029 | **0.028** | 0.044 |
| Piezometer | (P1) | 384 | 0.006 | **0.0003** | 0.0004 | 0.009 | **0.0003** | 0.001 |
|  | (P2) | 384 | 0.006 | **0.0003** | 0.0003 | 0.009 | **0.0003** | 0.001 |
