# Supplementary material for: Climate change and anthropological impacts on a karst aquifer: a multi- statistical assessment
Source: Research Square preprint supplement (doi:10.21203/rs.3.rs-2296043/v1), 2022-11-29
Supplement: Supplementary file 10 [file b54136709ed6f4b16646bf07.docx]

Table 3 Modified MK trend test results of the annual time series. indicates significant trend at 95% confidence limits (p-value).

| **Station** | **Time series** | **Zsg** | **Sen's Slope** | **p-value** | **Tau** | **Null hypothesis** |
| --- | --- | --- | --- | --- | --- | --- |
| Boushigan | Rainfall | -2.660 | -4.923 | 0.0078 | -0.333 | Rejected |
| Kazerun | Rainfall | -3.616 | -10.851 | 0.0003 | -0.452 | Rejected |
|  | Temperature | 6.000 | 0.054 | 0.0000 | 0.512 | Rejected |
| Parishan | Rainfall | -3.778 | -9.831 | 0.0002 | -0.472 | Rejected |
|  | Temperature | -1.681 | -0.017 | 0.0771 | -0.222 | Accepted |
| Dasht-Arjan | Rainfall | -4.450 | -14.874 | 0.0000 | -0.387 | Rejected |
|  | Temperature | 0.935 | 0.009 | 0.3070 | 0.129 | Accepted |
| Sarbalesh Aquifer | Groundwater level (P1) | -6.288 | -1.280 | 0.0000 | -0.778 | Rejected |
|  | Groundwater level(P2) | -6.417 | -1.463 | 0.0000 | -0.827 | Rejected |
