# Supplementary material for: Climate change and anthropological impacts on a karst aquifer: a multi- statistical assessment
Source: Research Square preprint supplement (doi:10.21203/rs.3.rs-2296043/v1), 2022-11-29
Supplement: Supplementary file 11 [file d7ea47f673925133ded35744.docx]

Table 2 Modified MK trend test results of the monthly time series. indicates significant trend at 95% confidence limits (p-value).

| **Location** | **Variable** | | **Zsg** | **Sen's Slope** | **p-value** | **Tau** | **Null hypothesis** |
| --- | --- | --- | --- | --- | --- | --- | --- |
| Boushigan | Rainfall | -0.523 | | 0.000 | 0.219 | -0.037 | Accepted |
| Kazerun | Rainfall | -1.178 | | 0.000 | 0.091 | -0.039 | Accepted |
|  | Temperature | 8.982 | | 0.005 | 0.000 | 0.332 | Reject H0 |
| Parishan | Rainfall | -0.987 | | 0.000 | 0.324 | -0.018 | Accepted |
|  | Temperature | -1.936 | | 0.000 | 0.053 | -0.062 | Accepted |
| Dasht-Arjan | Rainfall | -0.425 | | 0.000 | 0.3995 | -0.015 | Accepted |
|  | Temperature | 1.460 | | 0.004 | 0.103 | 0.059 | Accepted |
| Sarbalesh Aquifer | Groundwater level (P1) | -20.655 | | -0.111 | 0.000 | -0.753 | Rejected |
|  | Groundwater level (P2) | -22.131 | | -0.123 | 0.000 | -0.807 | Rejected |
