# Supplementary material for: Climate change and anthropological impacts on a karst aquifer: a multi- statistical assessment
Source: Research Square preprint supplement (doi:10.21203/rs.3.rs-2296043/v1), 2022-11-29
Supplement: Supplementary file 12 [file e7116b26ad563baf15ca00aa.docx]

Table 9. The correlation coefficient values between the original monthly time series and their (A+Ds) components.

| Time series | Groundwater level | | Rainfall | | | | Temperature | | |
| --- | --- | --- | --- | --- | --- | --- | --- | --- | --- |
|  | P1 | P2 | Boushigan | Kazerun | Parishan | Dasht Arjan | Kazerun | Parishan | Dasht Arjan |
| A+D1 | 0.940** | 0.964** | 0.537** | 0.523** | 0.565** | 0.518** | 0.114* | 0.0890 | 0.0570 |
| A+D2 | 0.941** | 0.964** | 0.450** | 0.565** | 0.450** | 0.513** | 0.298** | 0.279** | 0.296** |
| A+D3 | 0.953** | 0.967** | **0.658**** | **0.586**** | **0.652**** | **0.619**** | **0.918**** | **0.915**** | **0.897**** |
| A+D4 | 0.945** | 0.966** | 0.255** | 0.301** | 0.274** | 0.298** | 0.266** | 0.264** | 0.226** |
| A+D5 | 0.952** | 0.969** | 0.161** | 0.205** | 0.208** | 0.210** | 0.108* | 0.092 | 0.058 |
| A+D6 | **0.968**** | **0.987**** | 0.114* | 0.171** | 0.153** | 0.165** | 0.077 | 0.052 | 0.038 |
| **Correlation is significant at the 0.01 level (2-tailed). | | | | |  |  |  |  |  |
| *Correlation is significant at the 0.05 level (2-tailed). | | | | |  |  |  |  |  |
