# Supplementary material for: Climate change and anthropological impacts on a karst aquifer: a multi- statistical assessment
Source: Research Square preprint supplement (doi:10.21203/rs.3.rs-2296043/v1), 2022-11-29
Supplement: Supplementary file 13 [file f3eefdee52f3a9371c924fae.docx]

Table 14 The results of PMW test for the time series. The most probable change year point is shown in boldface. The numbers in parenthesis are the 2nd most probable change year point.

|  |  |  |  |  |
| --- | --- | --- | --- | --- |
| **Location** | **Variable** | **Change point (year)** |  | **Significant**  **Probability,** |
| Boushigan | Rainfall | (1998) **2006** | -3.089 | (0.791) **0.990** |
| Kazerun | Rainfall | (1998) **2006** | -3.856 | (0.988) **0.999** |
|  | Temperature | (2004) **1997** | -3.975 | (0.998) **0.999** |
| Parishan | Rainfall | (1998)  **2005** | -3.875 | (0.992) **0.999** |
|  | Temperature | **2004** | -2.053 | **0.896** |
| Dasht-Arjan | Rainfall | (1998) **2004** | -2.889 | (0.812) **0.990** |
|  | Temperature | **1997** | -2.238 | **0.929** |
| Sarbalesh Aquifer | Groundwater level (P1) | (2002) **2007** | -4.671 | (0.999 ) **1.000** |
|  | Groundwater level (P2) | (2007) **2002** | -4.777 | (0.999) **1.000** |
|  | SOI | (1998) **2005** | -1.937 | (0.755) **0.842** |
