# Supplementary material for: Climate change and anthropological impacts on a karst aquifer: a multi- statistical assessment
Source: Research Square preprint supplement (doi:10.21203/rs.3.rs-2296043/v1), 2022-11-29
Supplement: Supplementary file 14 [file feea534d89b9f4f3041e613c.docx]

Table 5. The relative error (RE) resulting from the application of the three border extension modes at two decomposition levels on the monthly time series.

| **Station** | **Series** | **Decomposition level (6)** | | | | **Decomposition level (7)** | | |
| --- | --- | --- | --- | --- | --- | --- | --- | --- |
| **No. of data** | **ZPE** | **SYE** | **PE** | **ZPE** | **SYE** | **PE** |
| Boushigan | Rainfall | 384 | **0.014** | 0.667 | 0.762 | 0.579 | **0.509** | 1.237 |
| Kazerun | Rainfall | 384 | **0.305** | 0.586 | 0.792 | 0.137 | **0.092** | 1.170 |
|  | Temperature | 384 | 0.466 | **0.326** | 0.523 | 0.730 | **0.600** | 0.930 |
| Parishan | Rainfall | 384 | 0.076 | **0.012** | 1.147 | **0.182** | 0.294 | 0.800 |
|  | Temperature | 384 | 1.150 | **0.582** | 1.475 | 1.556 | 1.300 | **0.963** |
| Dasht-Arjan | Rainfall | 384 | **0.067** | 0.273 | 0.806 | 0.279 | **0.079** | 1.156 |
|  | Temperature | 384 | 0.855 | 0.900 | **0.580** | 0.685 | **0.288** | 0.501 |
| Piezometer | (P1) | 384 | 0.880 | 0.316 | **0.030** | 1.117 | 0.388 | **0.241** |
|  | (P2) | 384 | 0.849 | 0.361 | **0.200** | 1.092 | 0.347 | **0.326** |
